# Supplementary material
Source: PubMed Central journal article supplement (PMC3059068)
Supplement: supp_M110.192351_jbc.M110.192351-1.pdf [file supp_M110.192351_jbc.M110.192351-1.pdf]

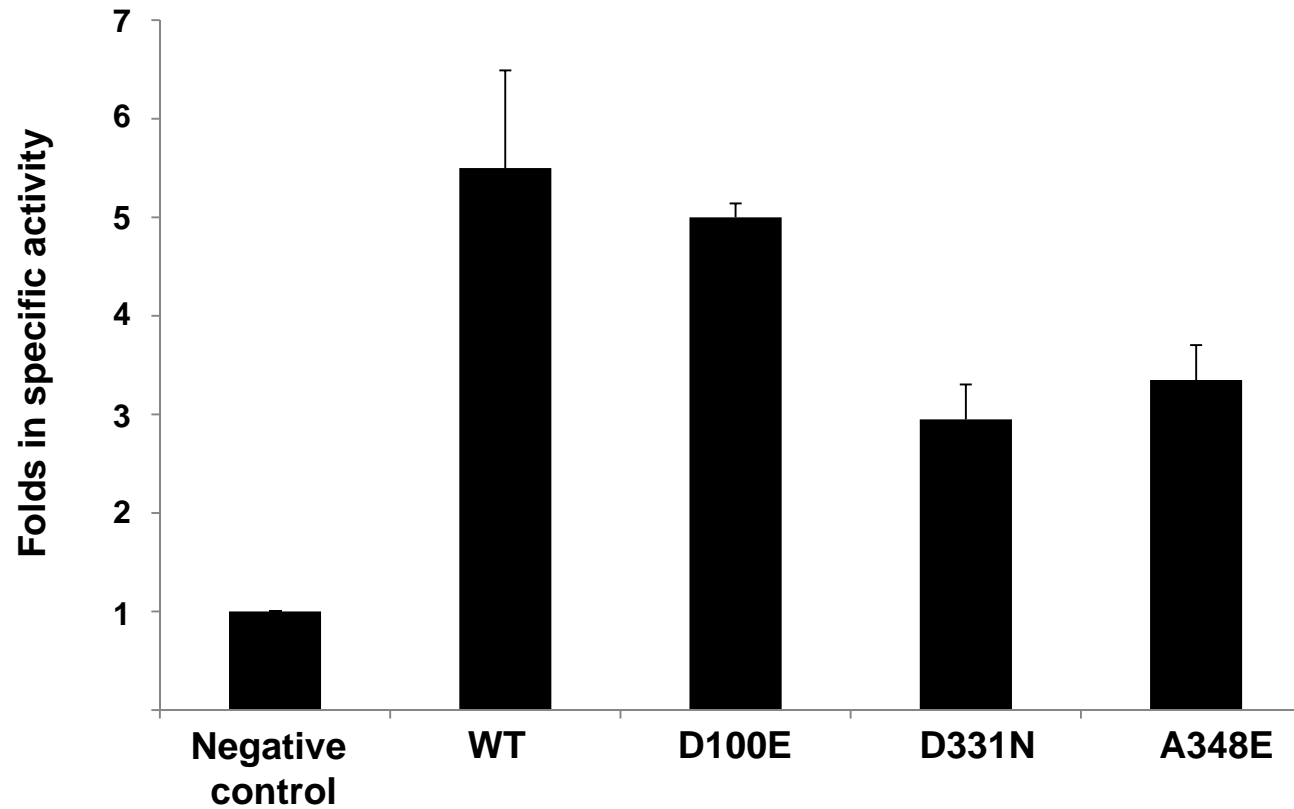

**Supplementary Fig.1** Enzyme activity is determined by absorbance at 330nm after photometric assay. Enzyme activities were divided to the total protein concentrations . The normalized enzyme activity without DBH was set to 1.0 to compare the relative activity of the wild type and mutants.
